# Supplementary material
Source: Springer Nature journal article supplement (https://www.springermedizin.de/resource/supplementary/12990_2010_301_MOESM2_ESM.pdf/9612984)

**a****ACC infusion sites**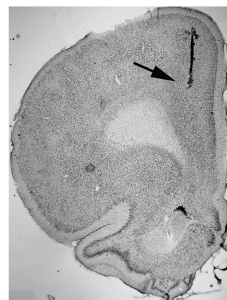**1 mm**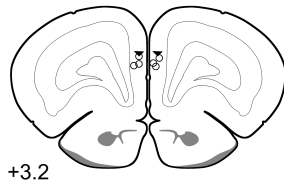

+3.2

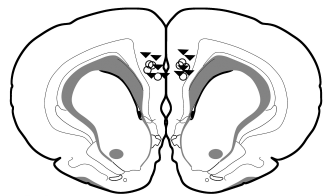

+2.15

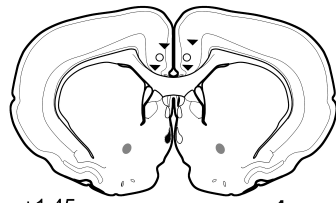

+1.45

**1 mm**

▼ Lidocaine -ACC

○ Saline -ACC

**b****Short retention test**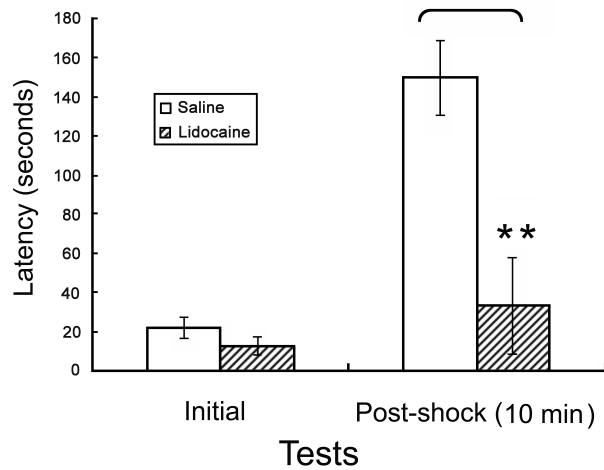

Supplement: MOESM2 [file 9612984]
